# Supplementary material
Source: HighWire-hosted journal article supplement (http://www.cmaj.ca/highwire/filestream/73705/field_highwire_adjunct_files/0/190124-res-1-at.pdf)
Supplement: 190124-res-1-at.pdf [file 190124-res-1-at.pdf]

**Supplementary Table 1 (as submitted by the authors): Anthropometric prediction equations for lean body mass and fat mass**

| <b>lean body mass</b> |                                                                                                                                                              | <b>R<sup>2</sup></b> | <b>SEE(kg)</b> |
|-----------------------|--------------------------------------------------------------------------------------------------------------------------------------------------------------|----------------------|----------------|
| <b>Men</b>            | 19.363 + 0.001*age (years) + 0.064*height (cm) + 0.756*weight (kg) -0.366*waist (cm) - 0.066*Mexican + 0.231*Hispanic + 0.432*Black - 1.007* Other ethnicity | 0.91                 | 2.55           |
| <b>Women</b>          | -10.683-0.039*age(years)+0.186*height(cm)+0.383*weight(kg)-0.043*waist(cm)-0.359*Mexican-0.059*Hispanic+1.085*Black -0.34 *Other ethnicity                   | 0.85                 | 2.38           |
| <b>Fat mass</b>       |                                                                                                                                                              |                      |                |
| <b>Men</b>            | -18.592-0.009*age(years)-0.080*height(cm)+0.226*weight(kg)+0.387*waist(cm)+0.080*Mexican-0.188*Hispanic-0.483*Black + 1.050*Other ethnicity                  | 0.90                 | 2.60           |
| <b>Women</b>          | 11.817+0.041*age(years)-0.199*height(cm)+0.610*weight(kg)+0.044*waist(cm)+0.388*Mexican+0.073*Hispanic-1.187*Black+0.325*Other ethnicity                     | 0.93                 | 2.44           |

Appendix to: Xing Z, Tang L, Chen J, et al. Association of predicted lean body mass and fat mass with cardiovascular events in patients with type 2 diabetes mellitus. *CMAJ* 2019. doi: 10.1503/cmaj.190124.

Copyright © 2019 The Author(s) or their employer(s).

To receive this resource in an accessible format, please contact us at [cmajgroup@cmaj.ca](mailto:cmajgroup@cmaj.ca).
